# Supplementary material for: Separation and Isolation of a New Hydroxylated Resveratrol Trimer Together with Other Stilbenoid Compounds from the Lianas of Gnetum microcarpum Blume and Their Inhibitory Effects of Prostaglandin E2
Source: MDPI journal article supplement (doi:10.3390/separations10090496), 2023-09-12
Supplement: s1 [file s1]

## Supplementary Material

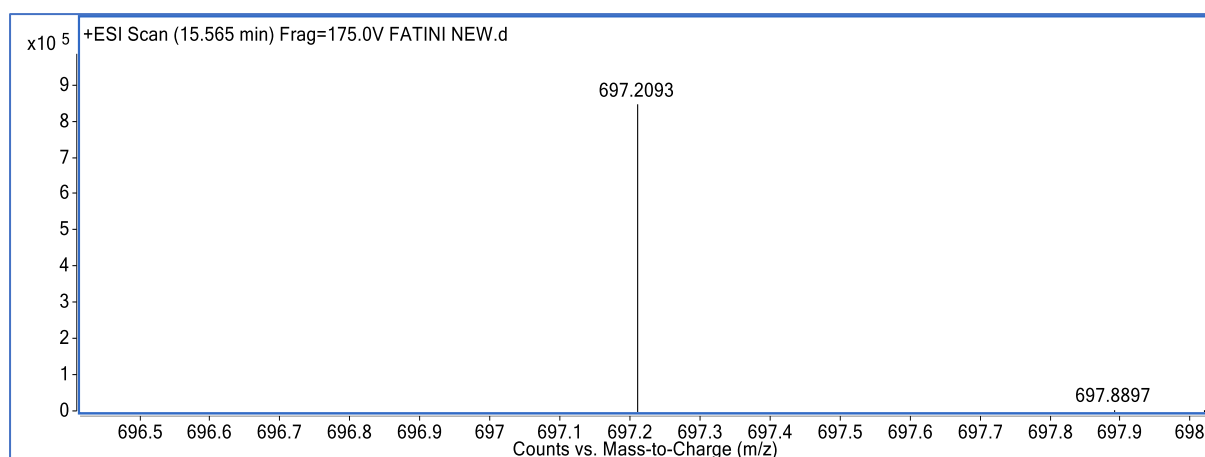

**Figure S1.** The HREIMS chromatogram for compound **1**.

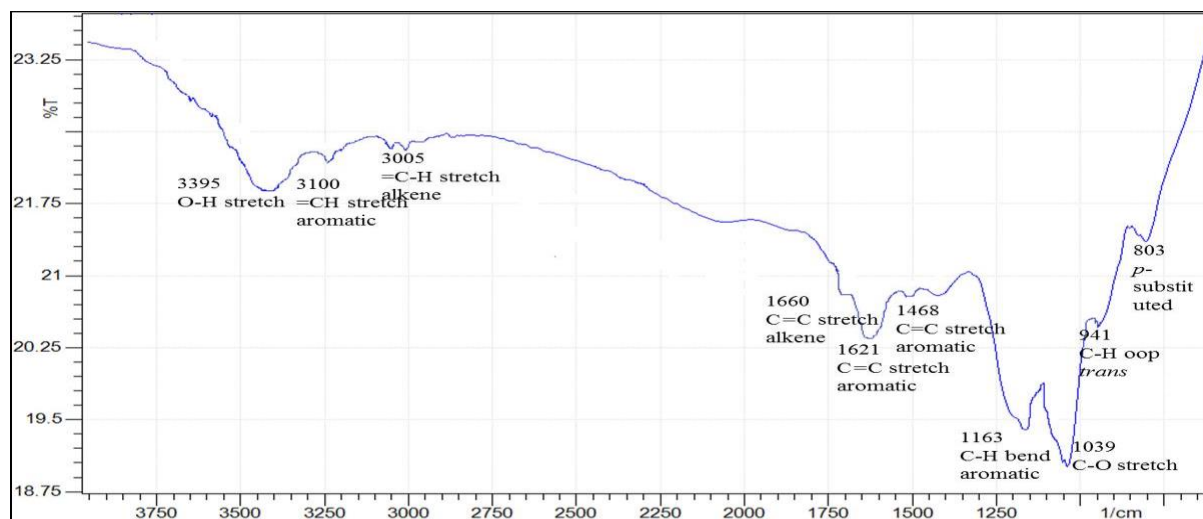

**Figure S2.** The IR spectrum of compound **1**.

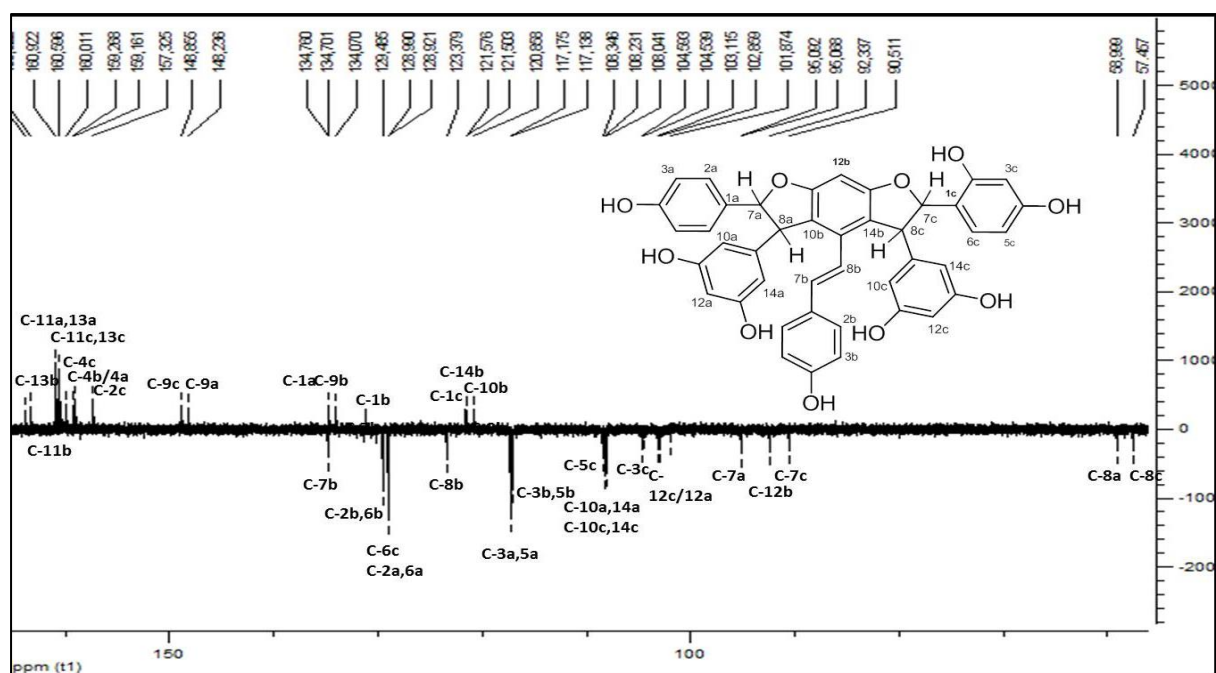

Figure S3.  $^{13}\text{C}$  APT spectrum of compound 1.

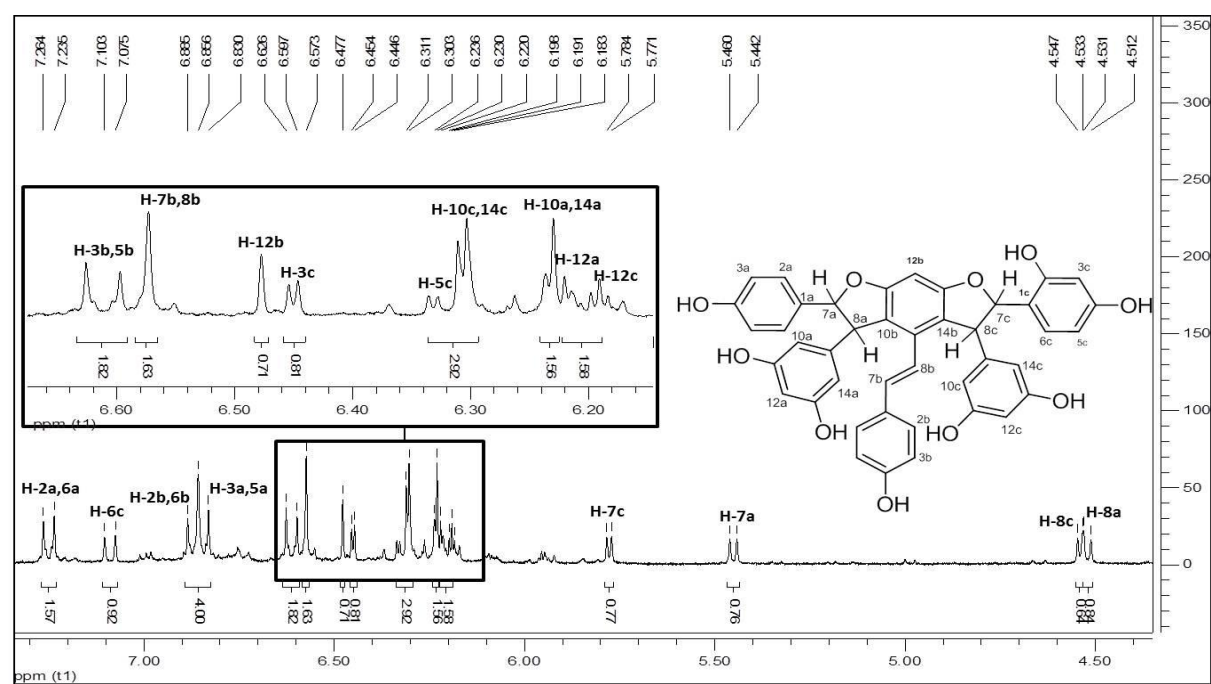

Figure S4.  $^1\text{H}$  NMR spectrum of compound 1.

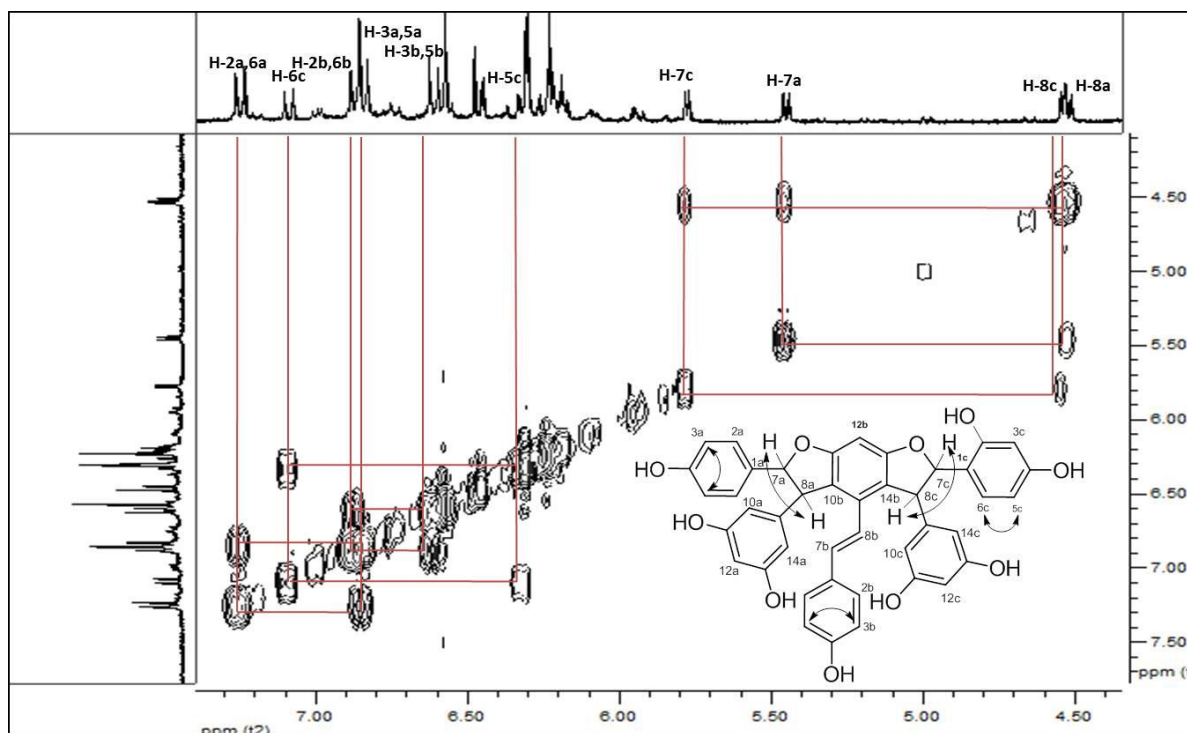

Figure S5. COSY spectrum of compound 1.

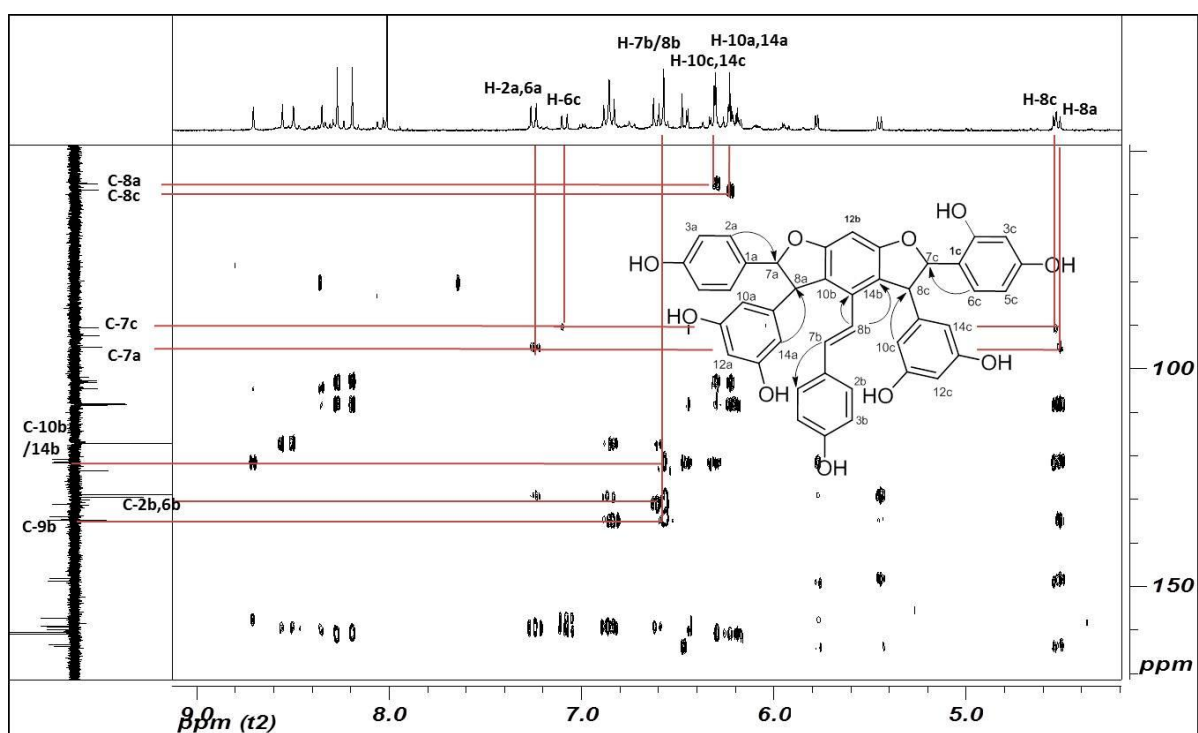

Figure S6. HMBC spectrum of compound 1.

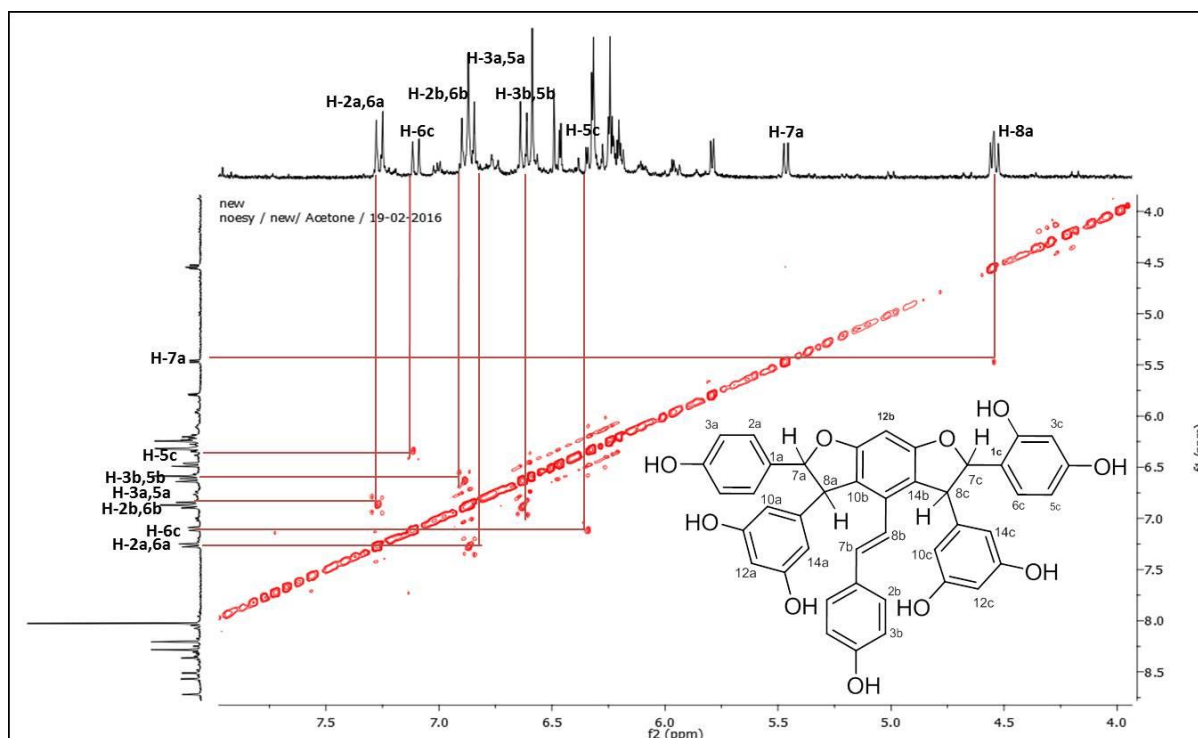

**Figure S7.** NOESY spectrum of compound **1**.

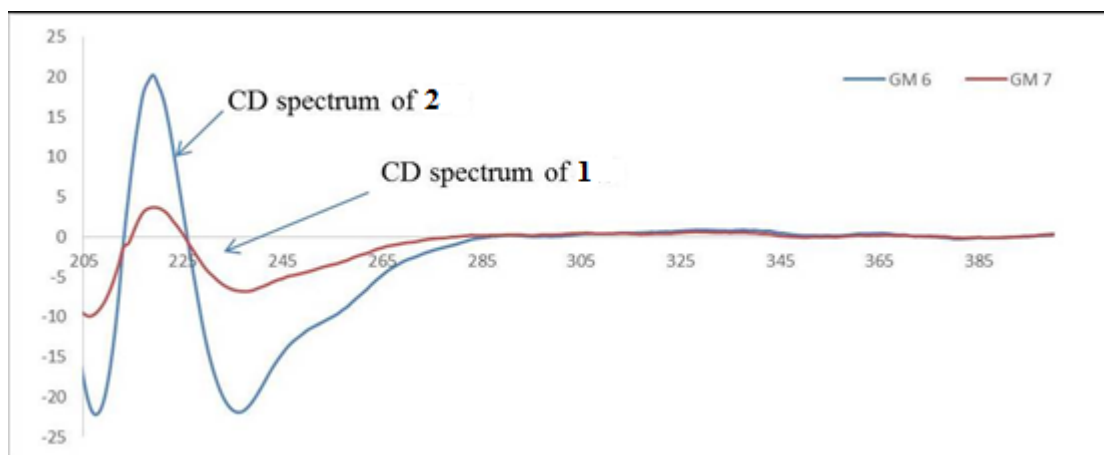

**Figure S8.** CD spectrum of malaysianol D (**1**) and F (**2**).

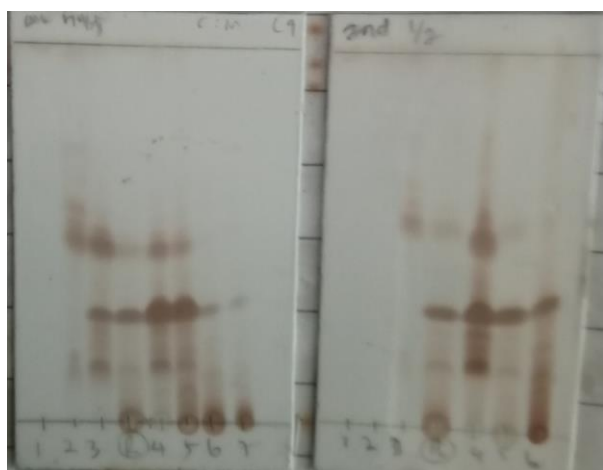

**Figure S9.** TLC chromatogram of *G. microcarpum* after VLC.

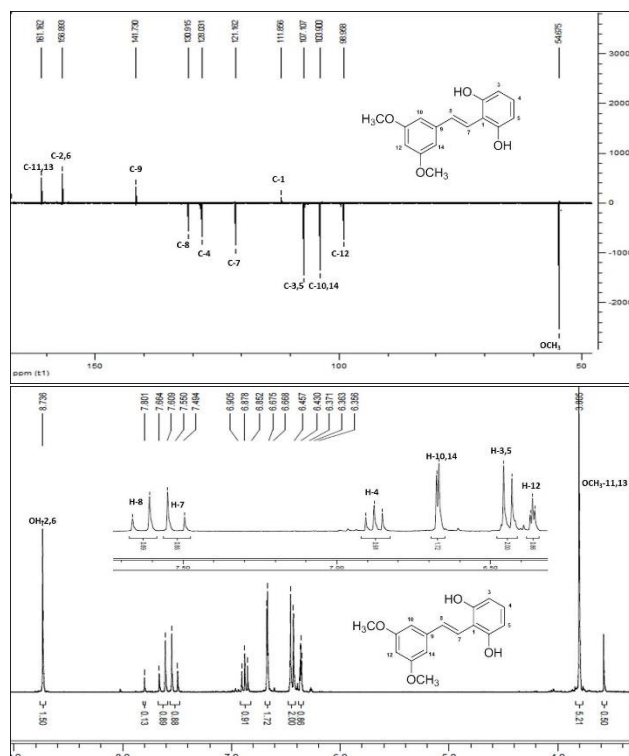

**Figure S10.**  $^1\text{H}$  and  $^{13}\text{C}$  NMR spectra of malaysianol E.

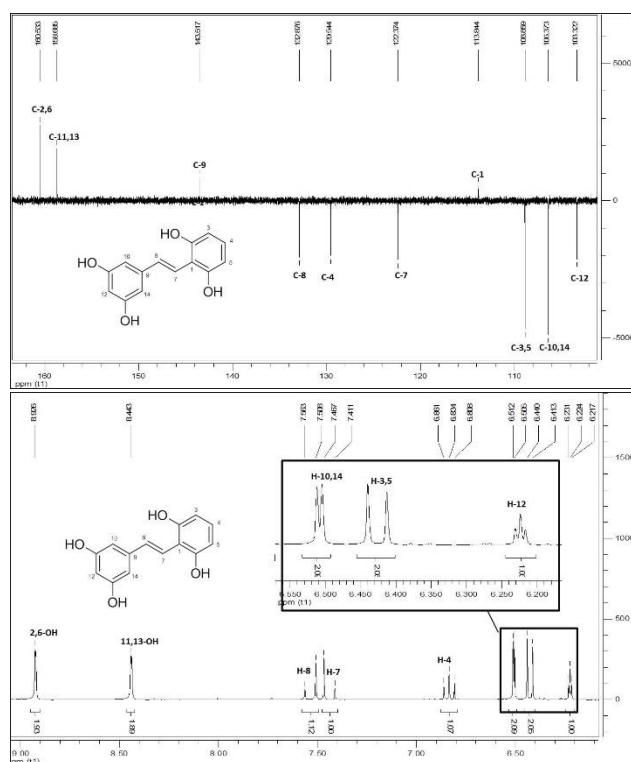

**Figure S11.**  $^1\text{H}$  and  $^{13}\text{C}$  NMR spectra of gnetol

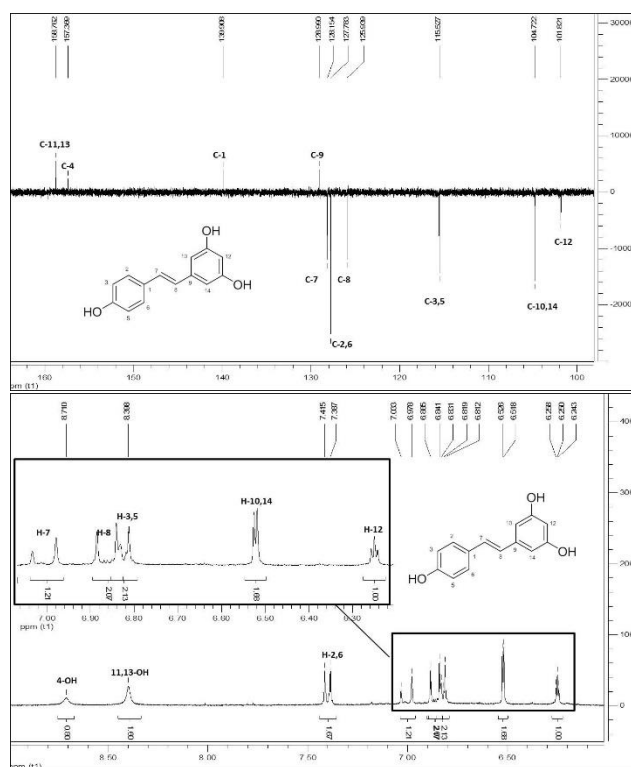

**Figure S12.**  $^1\text{H}$  and  $^{13}\text{C}$  NMR spectra of resveratrol

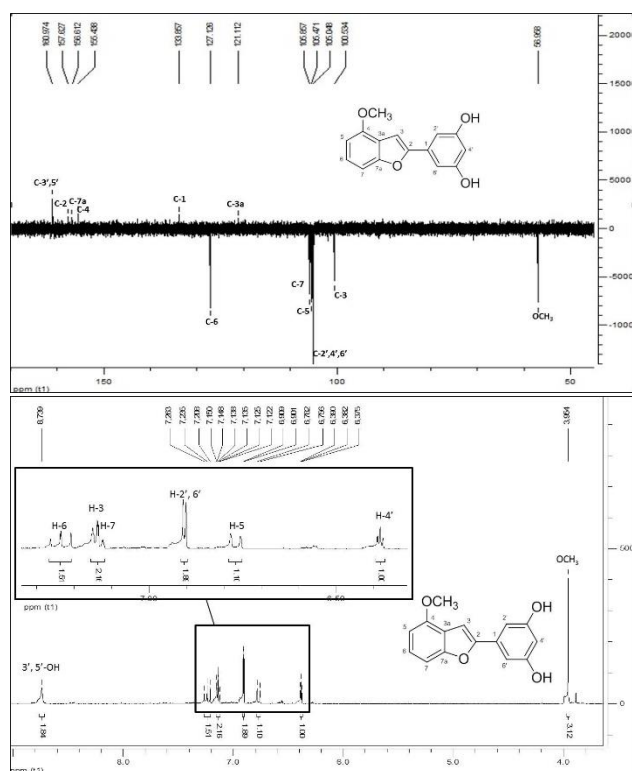

**Figure S13.**  $^1\text{H}$  and  $^{13}\text{C}$  NMR spectra of gnetucleistol c.

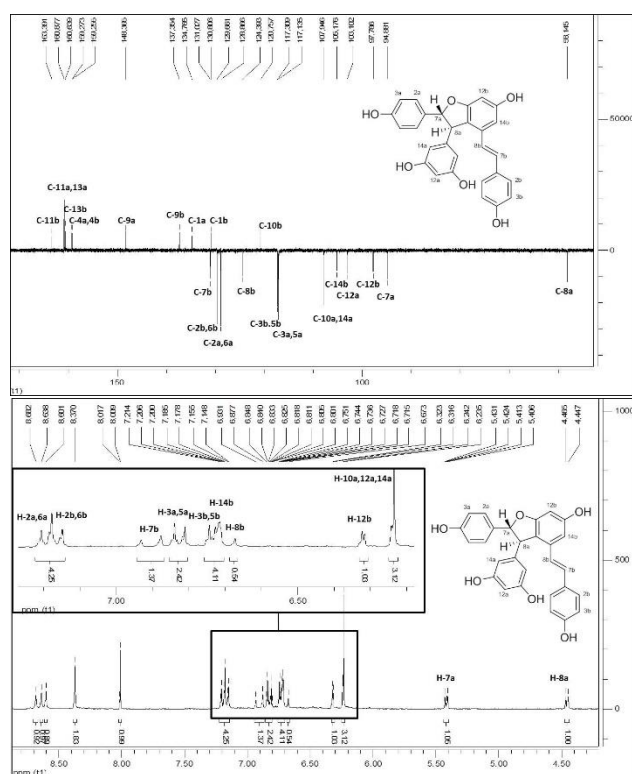

**Figure S14.**  $^1\text{H}$  and  $^{13}\text{C}$  NMR spectra of e-viniferin.

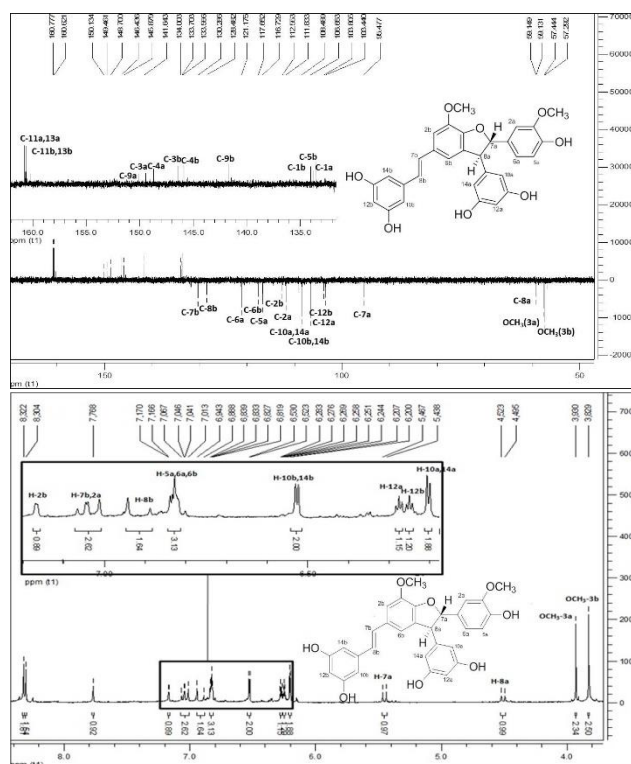

Figure S15.  $^1\text{H}$  and  $^{13}\text{C}$  NMR spectra of parvifolol d.

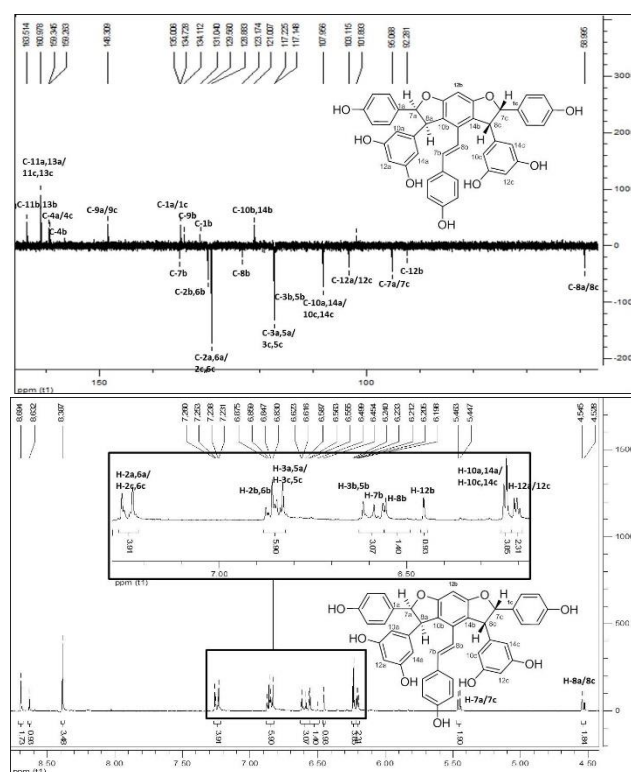

Figure S16.  $^1\text{H}$  and  $^{13}\text{C}$  NMR spectra of malaysianol D.



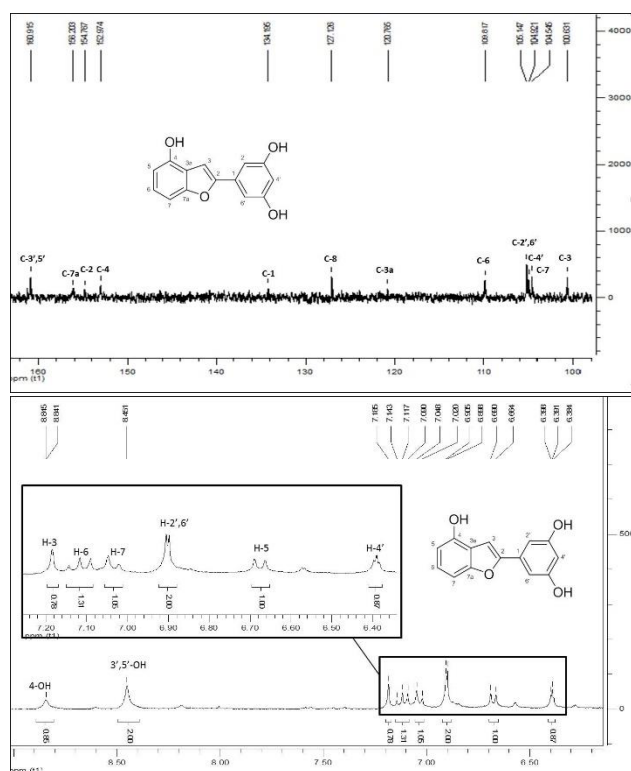

Figure S17.  $^1\text{H}$  and  $^{13}\text{C}$  NMR spectra of cuspidan B.

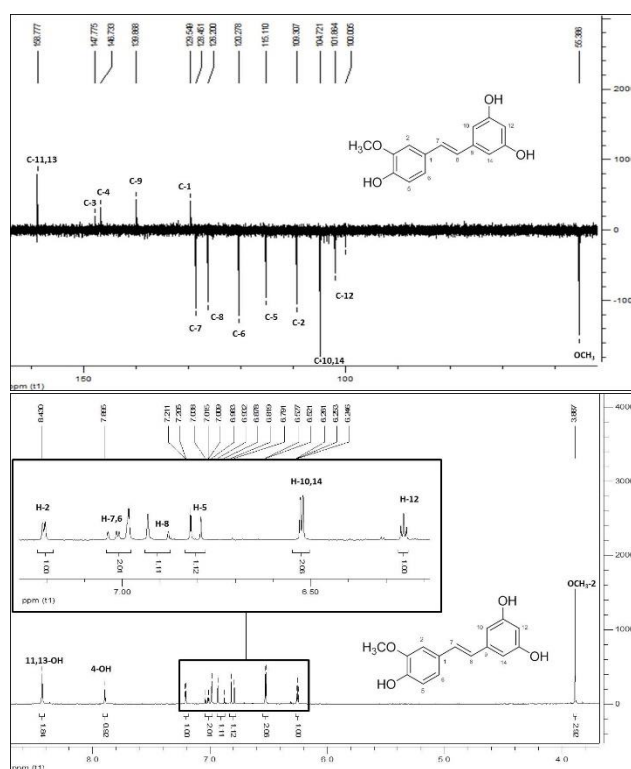

Figure S18.  $^1\text{H}$  and  $^{13}\text{C}$  NMR spectra of isorhapontigenin.

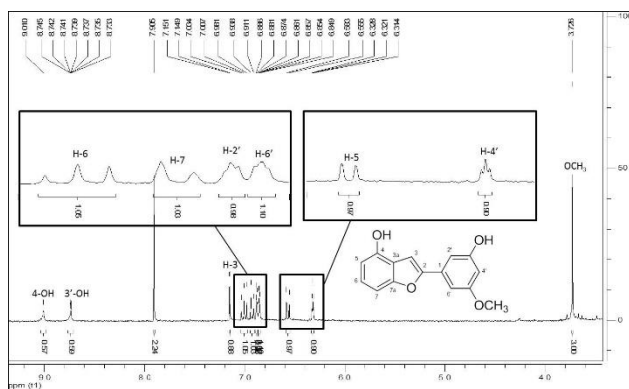

**Figure S19.**  $^1\text{H}$  and  $^{13}\text{C}$  NMR spectra of gnetifolin m.
