# Supplementary material for: Separation and Isolation of a New Hydroxylated Resveratrol Trimer Together with Other Stilbenoid Compounds from the Lianas of Gnetum microcarpum Blume and Their Inhibitory Effects of Prostaglandin E2
Source: MDPI journal article supplement (doi:10.3390/separations10090496), 2023-09-12
Supplement: s1 [file s1]

Archive with 1 entries (1 files):
- separations-2572184-supplementary.pdf
